# Supplementary material
Source: PubMed Central journal article supplement (PMC7150635)
Supplement: NIHMS1058983-supplement-Supp_figS2.pdf [file NIHMS1058983-supplement-Supp_figS2.pdf]

## Supplementary Figure 2

**A**

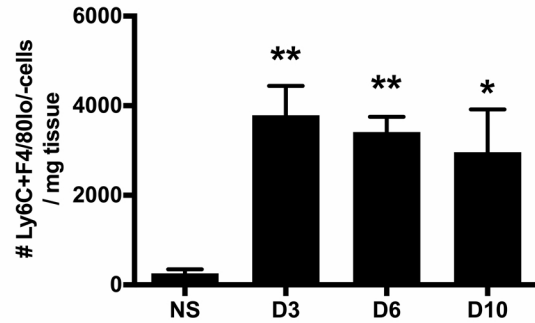

**B**

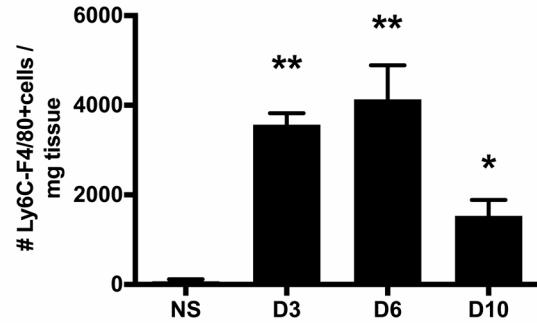

**C**

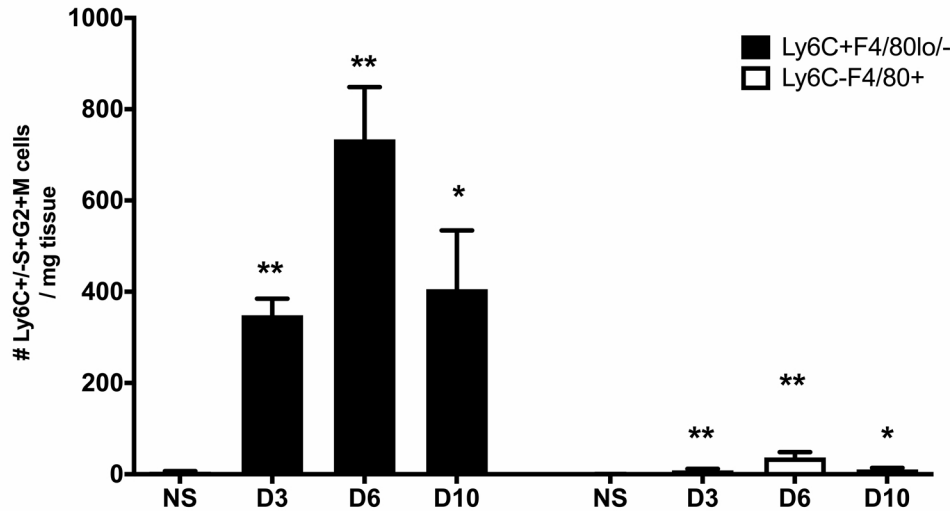

**Supplementary Figure 2.** (A) and (B) Injury induced altered numbers of Ly6C+F4/80lo<sup>-</sup> Mo/MΦ and Ly6C-F4/80<sup>+</sup> MΦ in normal skin (n=4) and wounds on days 3 (n=6), 6 (n=9), and 10 (n=7) post-injury. (C) Injury lead to significantly increased numbers of Ki67+FxCycle<sup>+</sup> cells (S/G2/M phases) in Ly6C+F4/80lo<sup>-</sup> Mo/MΦ and Ly6C-F4/80<sup>+</sup> MΦ in wounds. For each graph, data were pooled over three separate time course experiments; sample sizes given are pooled over experiments. Data are mean ± SEM; \*P < 0.05 or \*\*P < 0.01 vs non-injured skin group by ANOVA.
